# Supplementary material for: The efficient hydroxyalkylation of phenol with formaldehyde to bisphenol F over a thermoregulated phase-separable reaction system containing a water-soluble Brønsted acidic ionic liquid
Source: Royal Society of Chemistry journal article supplement (doi:10.1039/c4ra02827a), 2014-01-01
Supplement: c4ra02827a1.pdf [file c4ra02827a1.pdf]

### The chemical structures of imidazolium-based ILs

The chemical structures of the synthesized imidazolium-based ILs were determined by  $^1\text{H}$  NMR spectroscopy using a Bruker ARX400 spectrometer at room temperature with deuterated water ( $\text{D}_2\text{O}$ ) as the solvent. The detailed  $^1\text{H}$  NMR spectra of the synthesized imidazolium-based ILs shown in Figs. S1-S7 was in agreement with the designed structures.

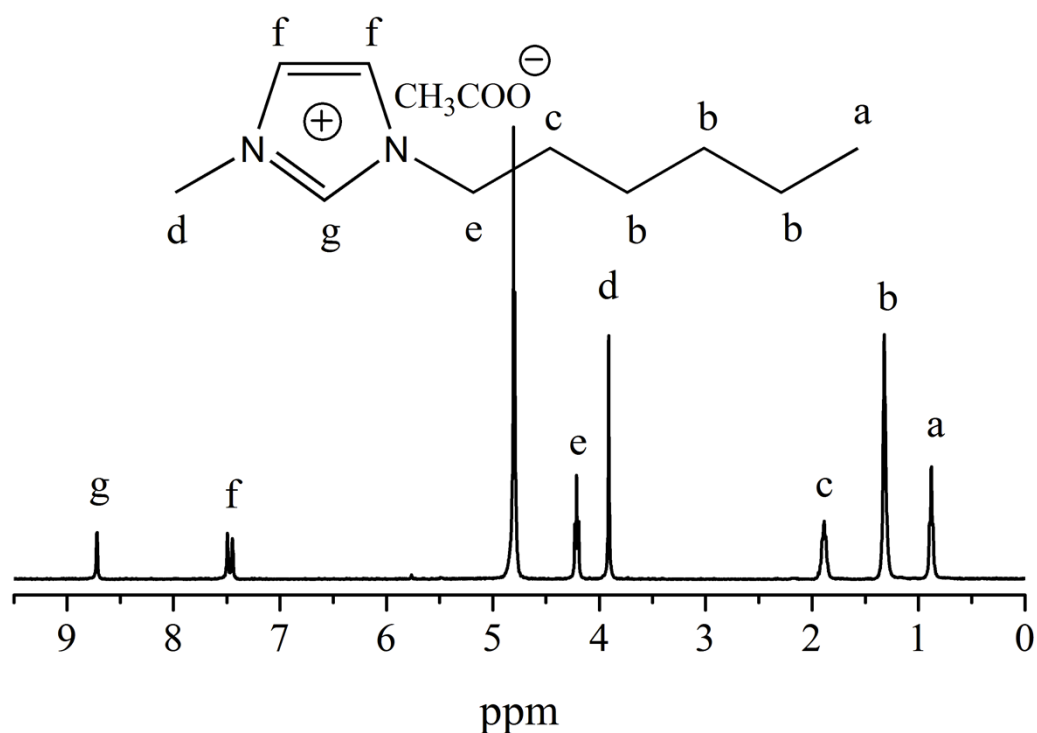

Fig. S1.  $^1\text{H}$  NMR spectrum of  $[\text{C}_6\text{MIM}][\text{CH}_3\text{COO}]$

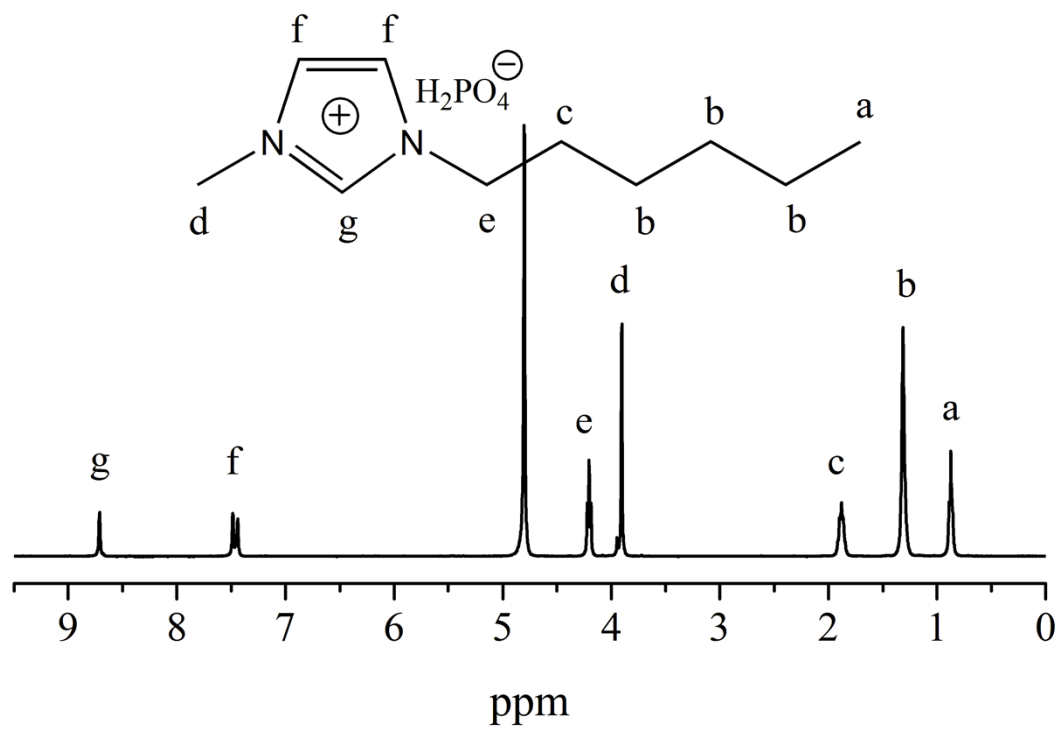

Fig. S2. <sup>1</sup>H NMR spectrum of [C<sub>6</sub>MIM][H<sub>2</sub>PO<sub>4</sub>]

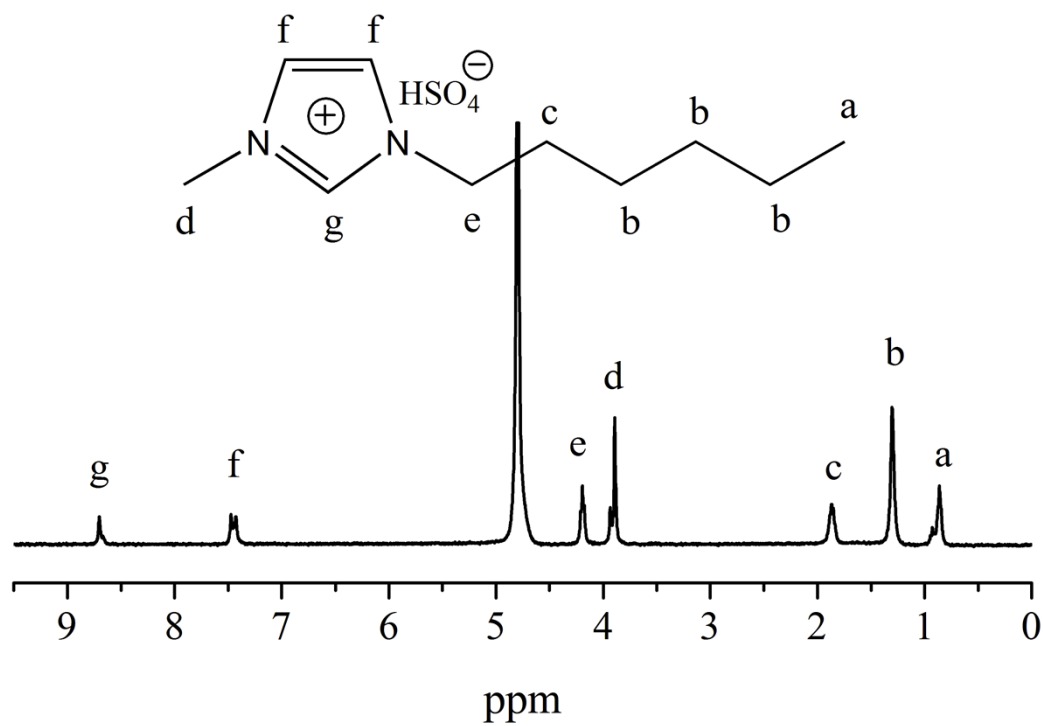

Fig. S3. <sup>1</sup>H NMR spectrum of [C<sub>6</sub>MIM][HSO<sub>4</sub>]

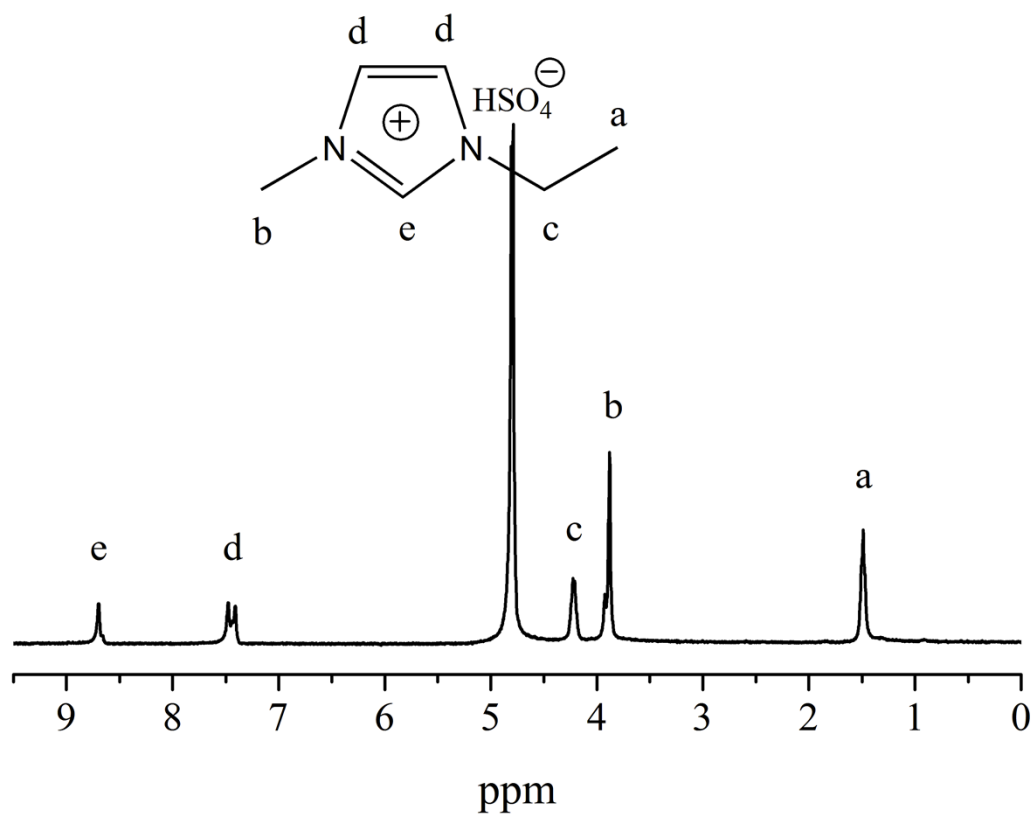

Fig. S4.  $^1\text{H}$  NMR spectrum of  $[\text{C}_2\text{MIM}][\text{HSO}_4]$

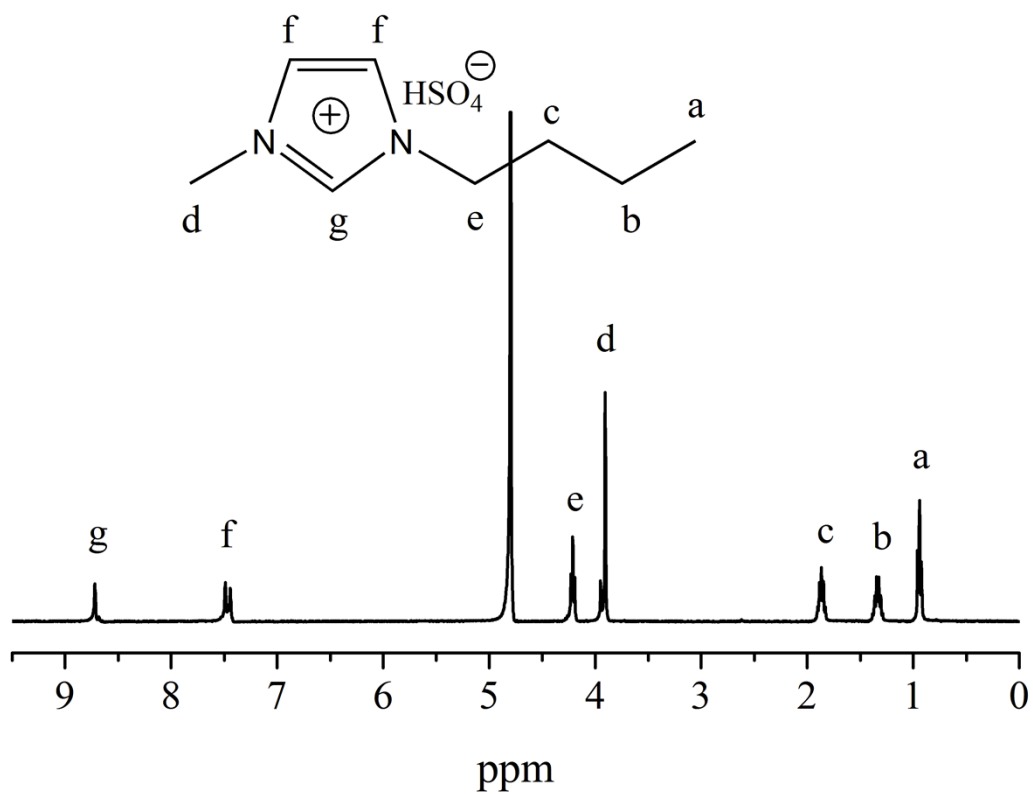

Fig. S5. <sup>1</sup>H NMR spectrum of [C<sub>4</sub>MIM][HSO<sub>4</sub>]

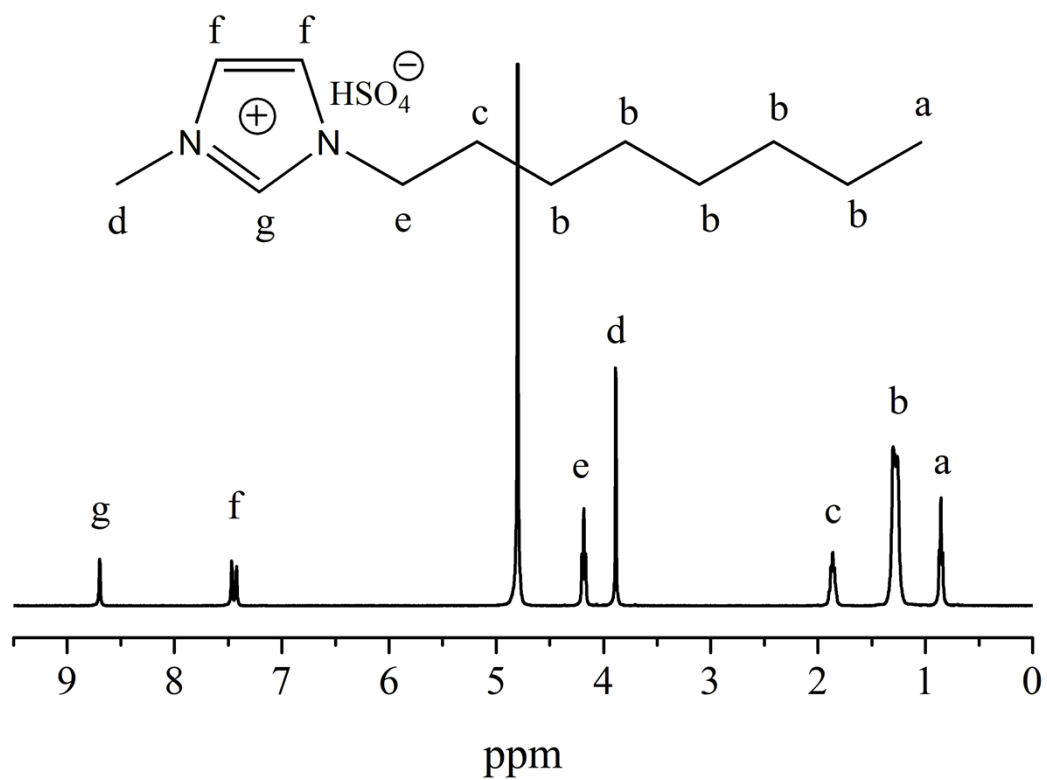

Fig. S6. <sup>1</sup>H NMR spectrum of [C<sub>8</sub>MIM][HSO<sub>4</sub>]

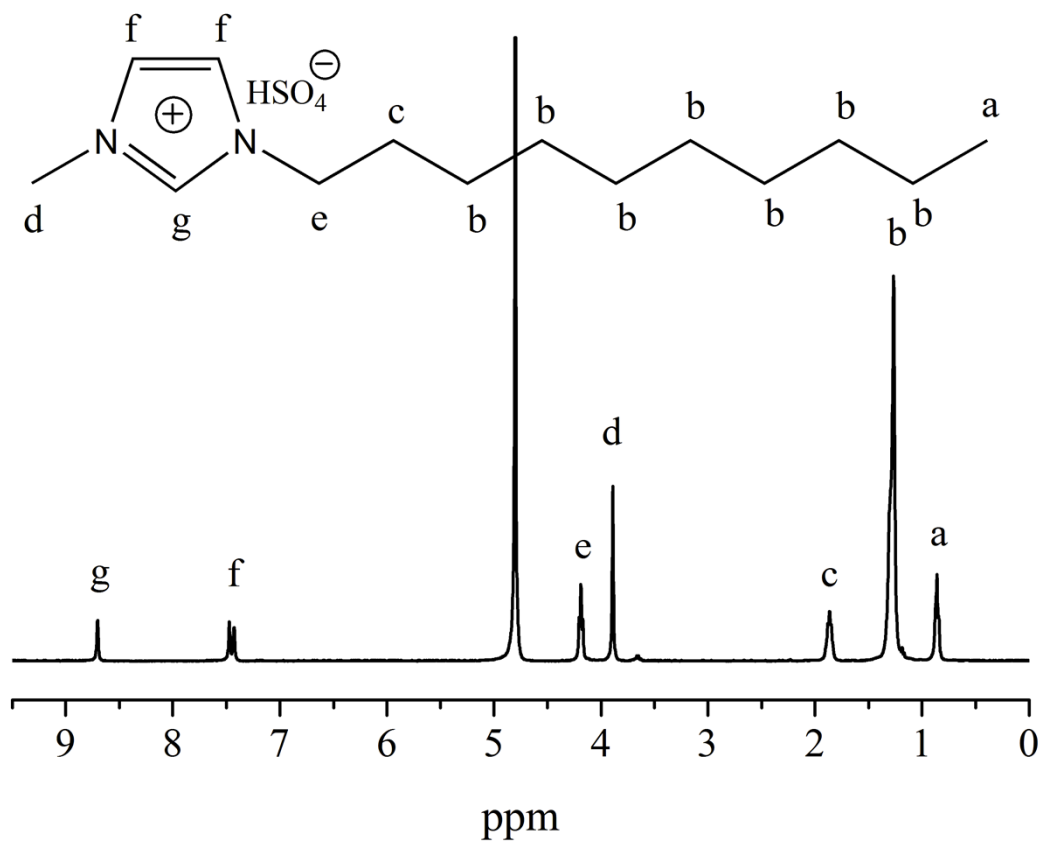

Fig. S7. <sup>1</sup>H NMR spectrum of [C<sub>10</sub>MIM][HSO<sub>4</sub>]

## The acidity measurement

The Brønsted acid scales of the synthesized imidazolium-based ILs were determined using a Cary 5000 UV-vis spectrophotometer with a basic indicator according to the previously reported Hammett method. 4-Nitroaniline (5 mg/L,  $pK(I)_{aq} = 0.99$ ) was chosen as the basic indicator in water, and the concentration of each IL was 27 mmol/L. The detailed absorbances of the unprotonated form of the indicator with different IL in water were shown in Figs. S8 and S9.

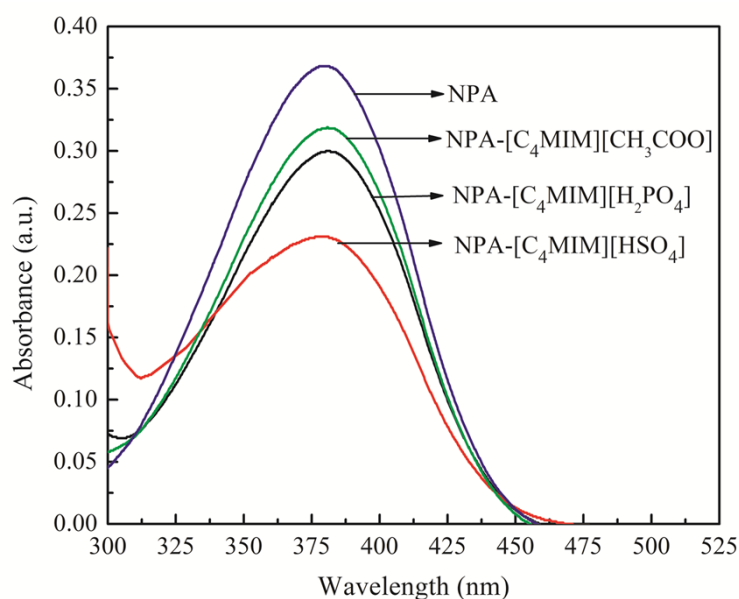

Fig. S8. Absorbance spectra of 4-nitroaniline (NPA) for BAILs with various anions in water



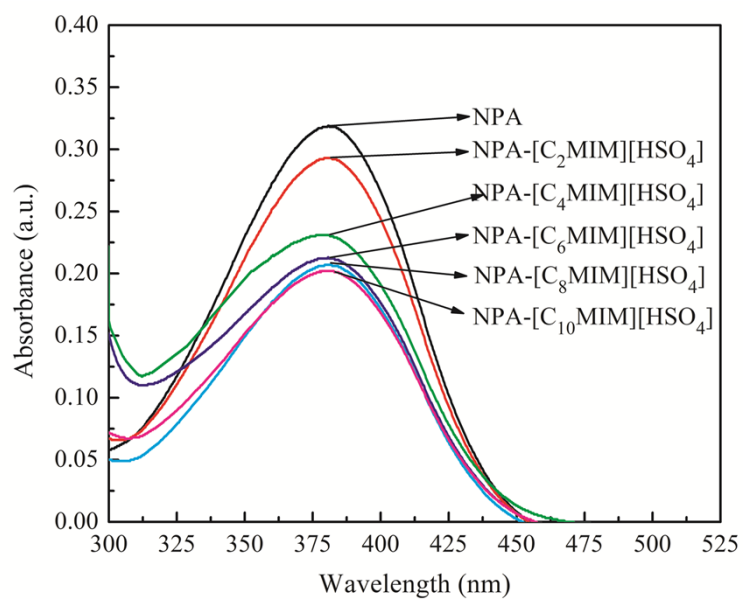

Fig. S9. Absorbance spectra of 4-nitroaniline (NPA) for BAILs with various cations in water

## The characterization of Bisphenil F

The Bisphenil F is confirmed by the GC-MS analysis as shown in Fig. S10. The peaks of Bisphenil F are composed of three isomer peak of 2,2'-isomer (a), 2,4'-isomer (b) and 4,4'-isomer (c) with retention time of 22.8, 23.0, 23.5 min., respectively.

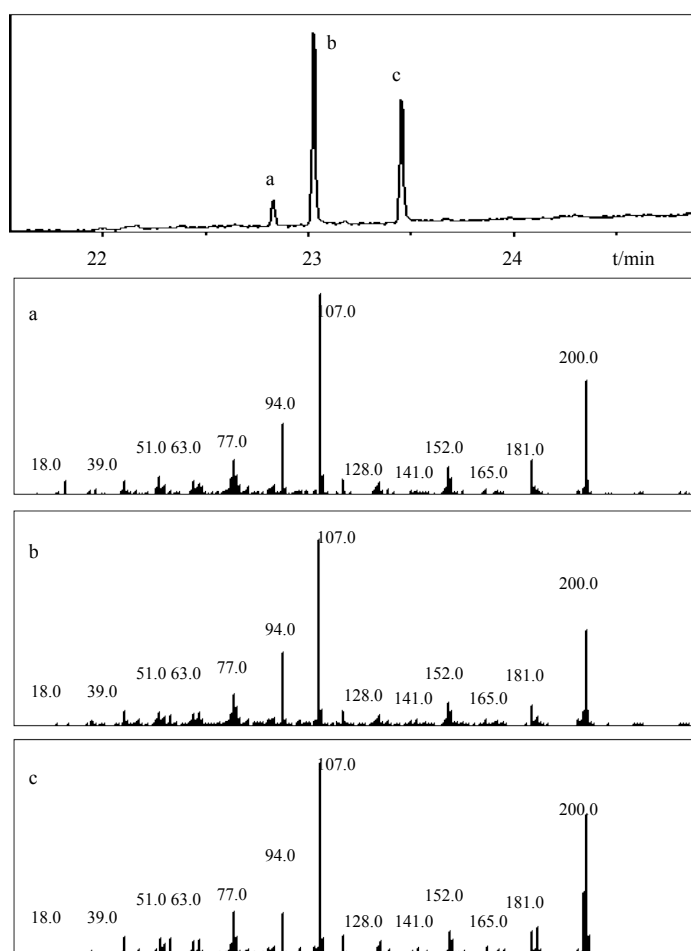

Fig. S10. GC-MS spectra of bisphenol F product
